# Supplementary material for: High-pressure activation for the solvent- and catalyst-free syntheses of heterocycles, pharmaceuticals and esters
Source: publisher site journal article supplement (doi:10.3762/bjoc.21.102), 2025-07-02
Supplement: Additional file 1 [file 1860-5397-21-102-S1.pdf]

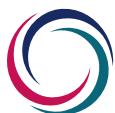

## Supporting Information

for

### High-pressure activation for the solvent- and catalyst-free syntheses of heterocycles, pharmaceuticals and esters

Kelsey Plasse, Valerie Wright, Guoshu Xie, R. Bernadett Vlocskó, Alexander Lazarev and Béla Török

*Beilstein J. Org. Chem.* **2025**, 21, 1374–1387. doi:10.3762/bjoc.21.102

### Materials and methods, spectral data of new compounds, and HRMS spectra of known products

## Table of contents

|    |                                      |     |
|----|--------------------------------------|-----|
| 1. | Materials and methods .....          | S2  |
| 2. | Spectral data of new compounds ..... | S3  |
| 3. | HRMS spectra of known products ..... | S6  |
| 4. | References .....                     | S13 |

## 1. Materials and methods

**Materials:** All substrates (aldehydes, hydrazones, alcohols, *p*-aminophenol, salicylic acid, acetic anhydride, acetic acid, hexan-2,5-dione, aniline, hexylamine and 2-phenylethylamine) were purchased from Aldrich and used without any purification. CDCl<sub>3</sub> and DMSO-*d*<sub>6</sub> used as a solvent (99.8%) for NMR studies was an Aldrich product. Ethyl acetate used to dissolve the product for GC–MS analysis (minimum purity of 99.5%) was purchased from ThermoFisher Scientific. The small scale reactor tubes were made of teflon and obtained from Pressure BioSciences Inc. while the larger scale bulbs and bottles used as reaction vessels were made of low-density polyethylene and purchased from ThermoFisher Scientific.

**Analysis:** The <sup>1</sup>H and <sup>13</sup>C spectra of new compounds were obtained on a 400 MHz Agilent MM2 NMR spectrometer, in CDCl<sub>3</sub> with either using the signal of tetramethylsilane or the residual solvent signal as reference. The temperature was 25 °C (accuracy ±1 °C). All products were known compounds and the NMR spectra were in agreement with earlier sources. The mass spectrometric identification and purity and yield determination (referred to as GC yields) of the products have been carried out by using an Agilent 7250 GC-QTOF mass spectrometer operated in electron impact ionization (EI, 70 eV) mode using a 30 m long DB-5 type column (J&W Scientific).

## 2. Spectra of the new products:

The compounds were known products, except for 1,3-dihydrobenzimidazoles **3b** and **3d**. The characterization for these compounds is provided below, while the HRMS spectra are provided for the other known products.

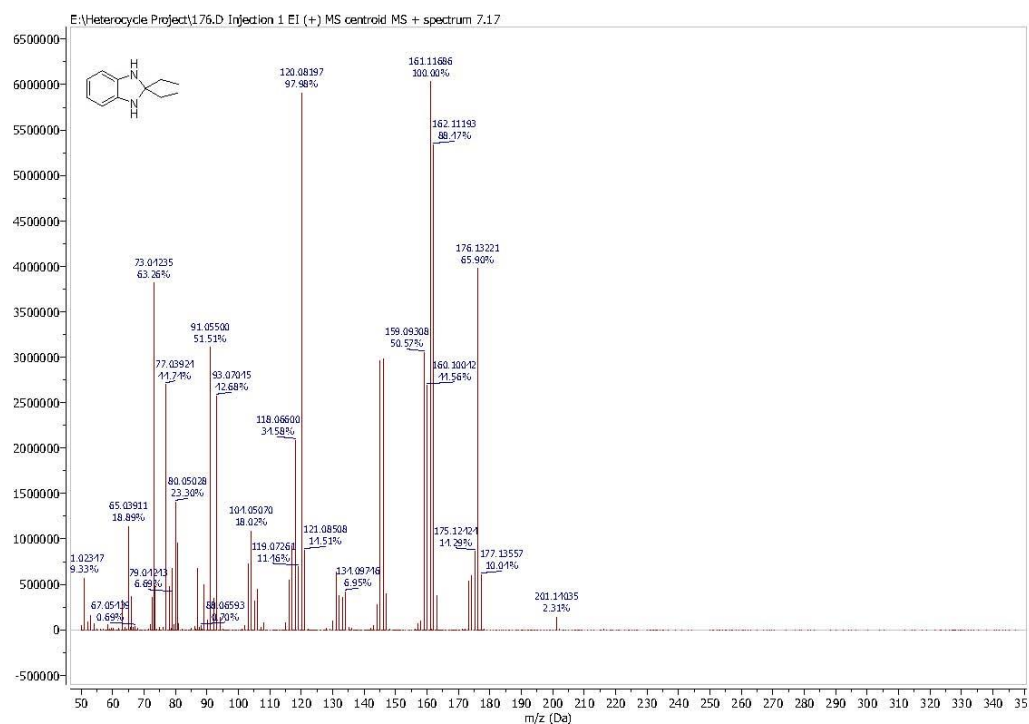

**Figure S1.** HRMS spectrum of 2,2-diethyl-2,3-dihydro-1*H*-benzo[*d*]imidazole (**3b**). (EI):  $m/z$ : calcd. for  $C_{11}H_{16}N_2$ : 176.1313, found: 176.1322

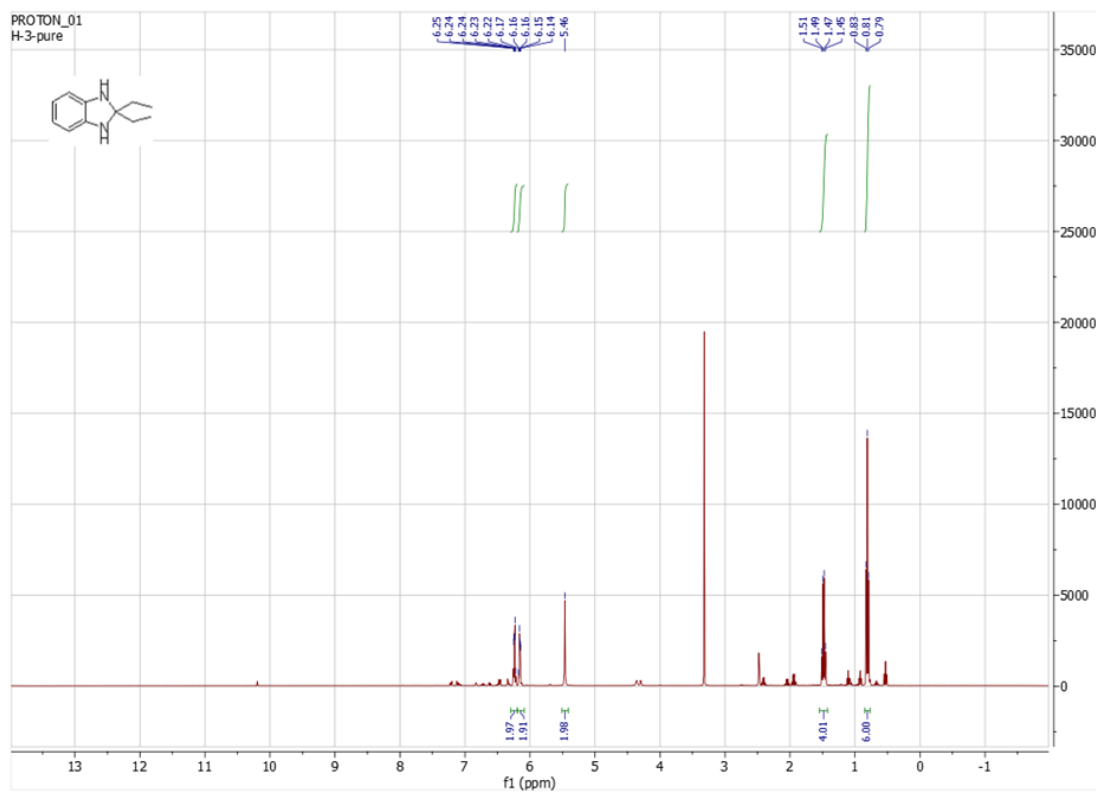

**Figure S2.**  $^1H$  NMR spectrum of 2,2-diethyl-2,3-dihydro-1*H*-benzo[*d*]imidazole (**3b**).

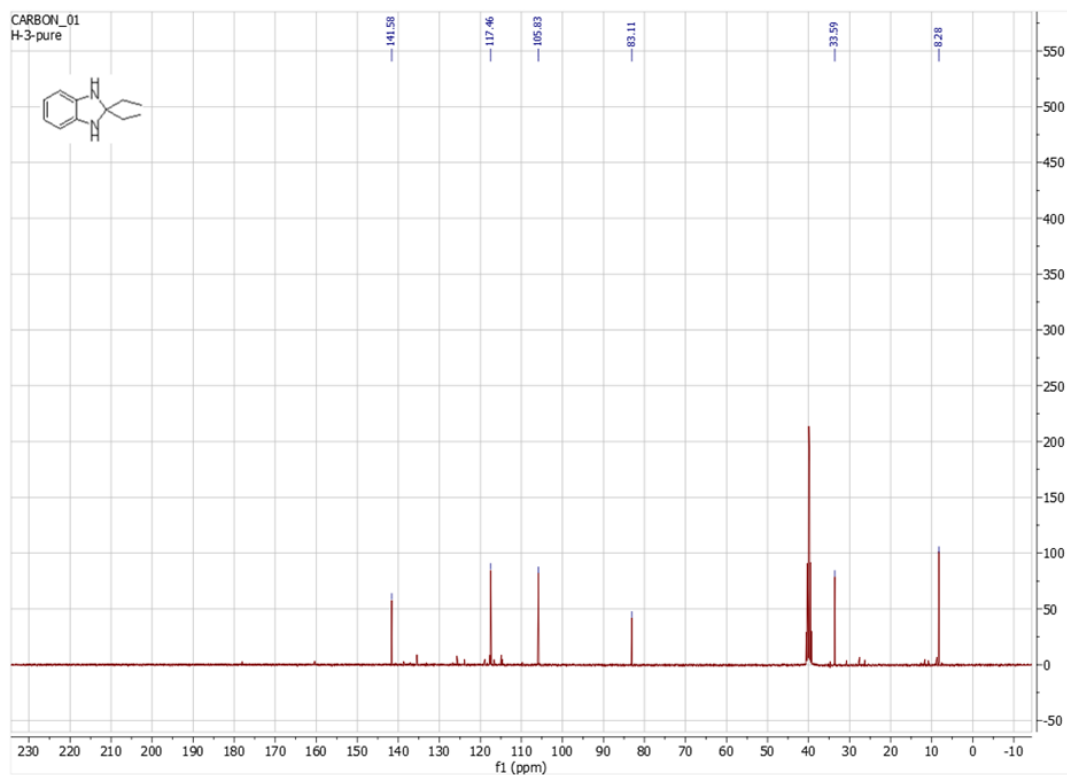

**Figure S3.**  $^{13}\text{C}$  NMR spectrum of 2,2-diethyl-2,3-dihydro-1H-benzo[d]imidazole (**3b**).

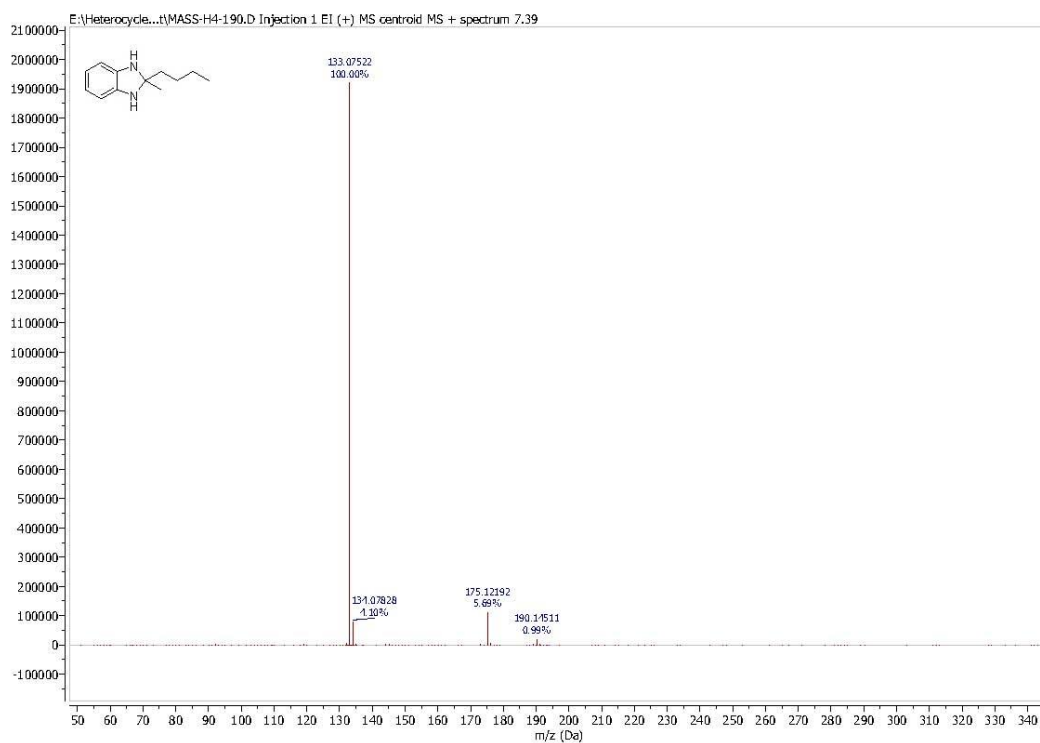

**Figure S4.** HRMS spectrum of 2-butyl-2-methyl-2,3-dihydro-1H-benzo[d]imidazole (**3d**).  
(EI): m/z: calcd. for  $\text{C}_{12}\text{H}_{18}\text{N}_2$  : 190.1470, found: 190.1451

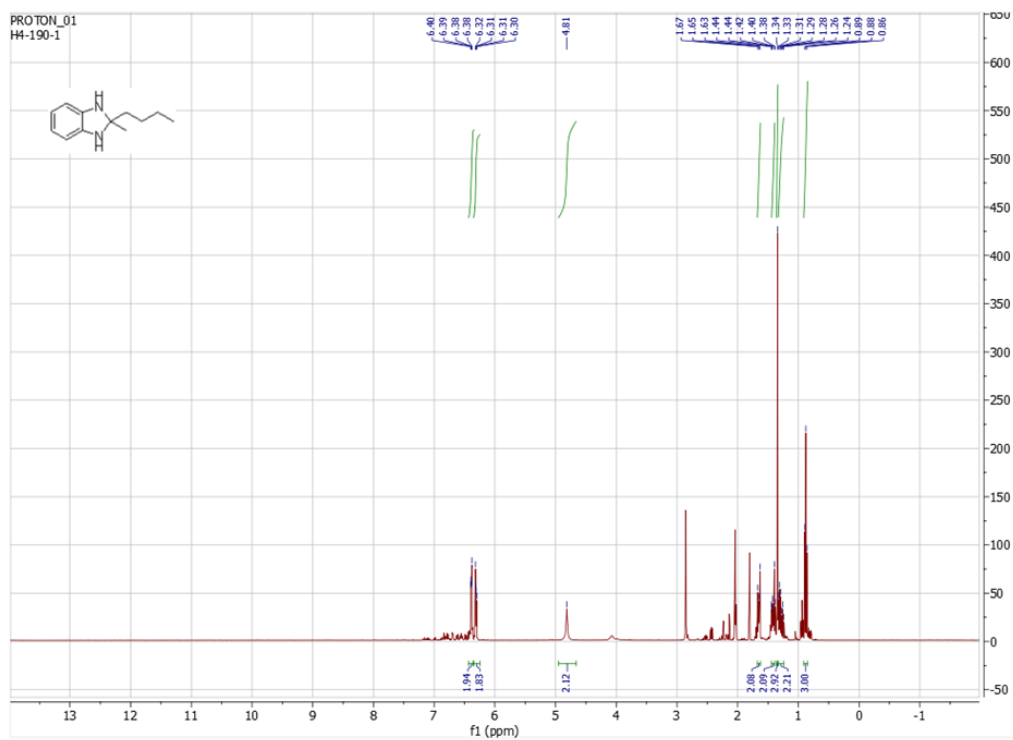

**Figure S5.**  $^1\text{H}$  NMR spectrum of 2-butyl-2-methyl-2,3-dihydro-1*H*-benzo[*d*]imidazole (**3d**).

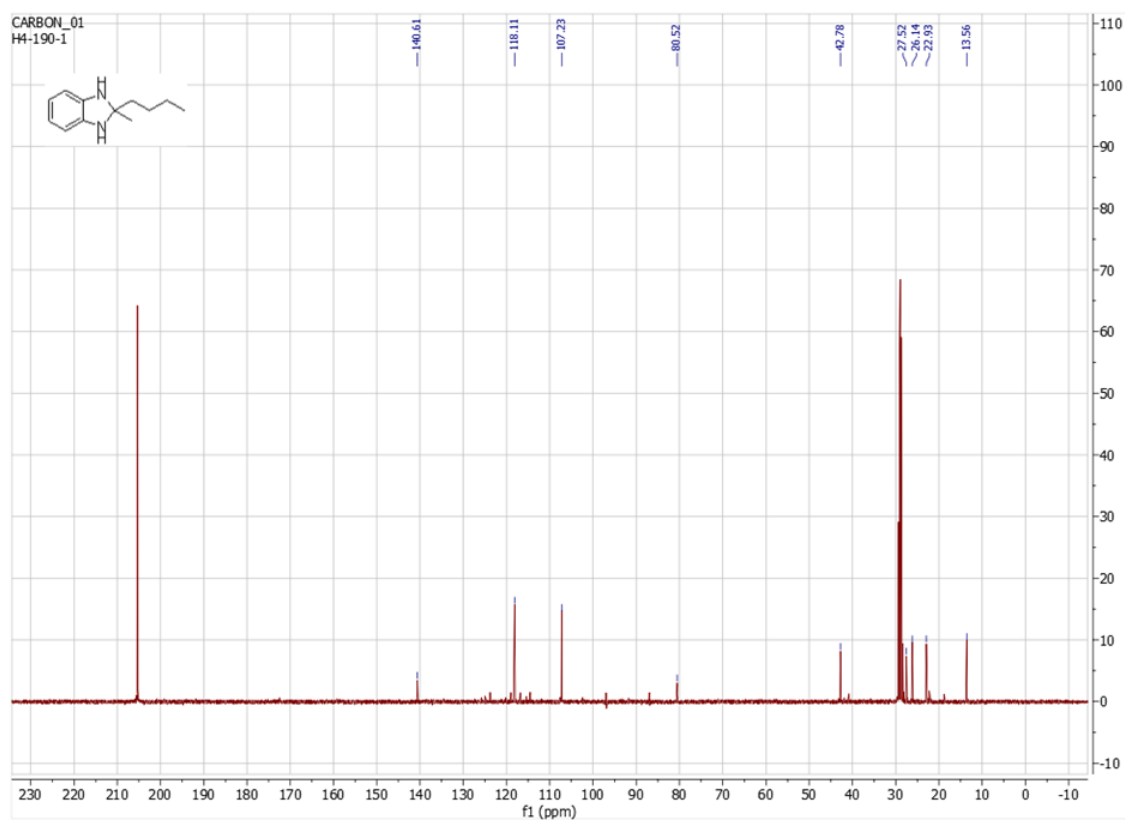

**Figure S6.**  $^{13}\text{C}$  NMR spectrum of 2-butyl-2-methyl-2,3-dihydro-1*H*-benzo[*d*]imidazole (**3d**).

### 3. HRMS spectra of known products

The data are in agreement with the relevant literature and is within the 5ppm expected accuracy to the calculated values.

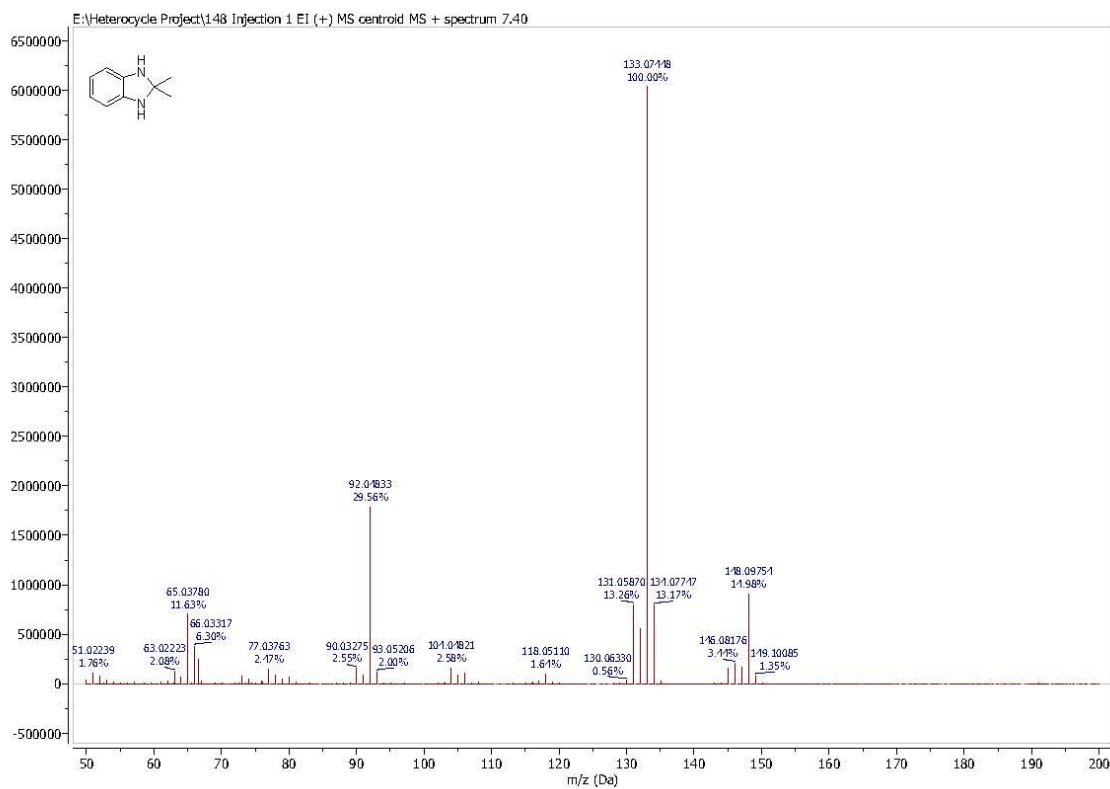

**Figure S7.** HRMS spectrum of 2,2-dimethyl-2,3-dihydro-1*H*-benzo[*d*]imidazole (**3a**).<sup>1</sup>

(EI): m/z: calcd. for C<sub>9</sub>H<sub>12</sub>N<sub>2</sub>: 148.1000, found: 148.0975

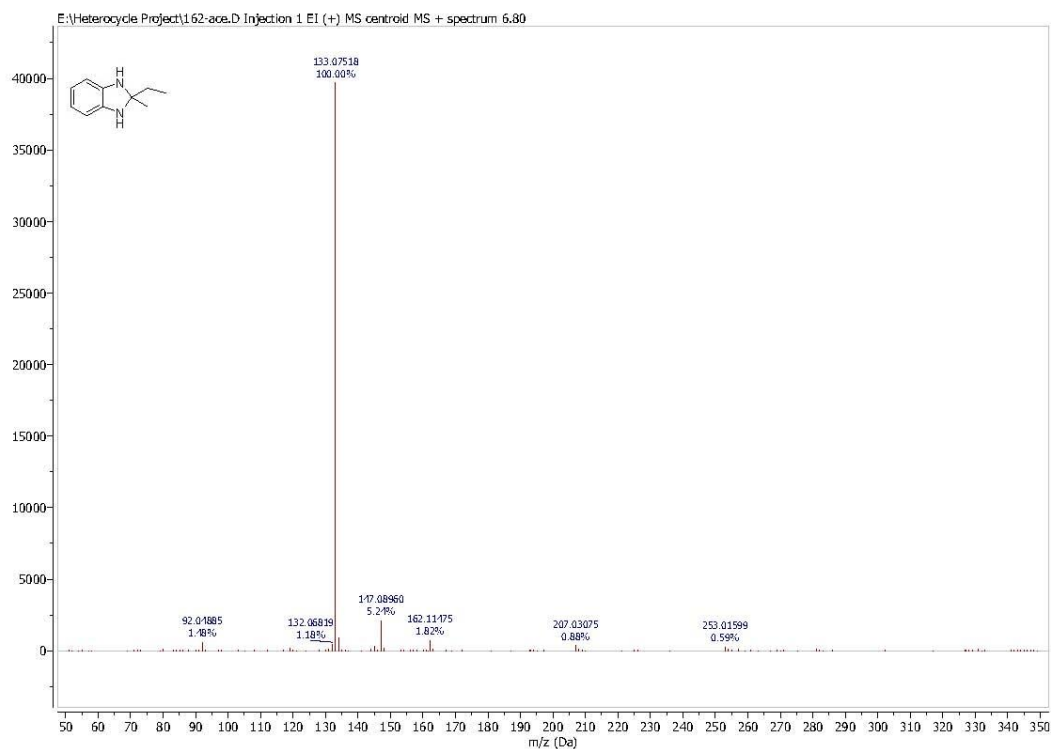

**Figure S8.** HRMS spectrum of 2-ethyl-2-methyl-2,3-dihydro-1*H*-benzo[*d*]imidazole(**3c**).<sup>2</sup>

(EI): m/z: calcd. for C<sub>10</sub>H<sub>14</sub>N<sub>2</sub> : 162.1157, found: 162.1147

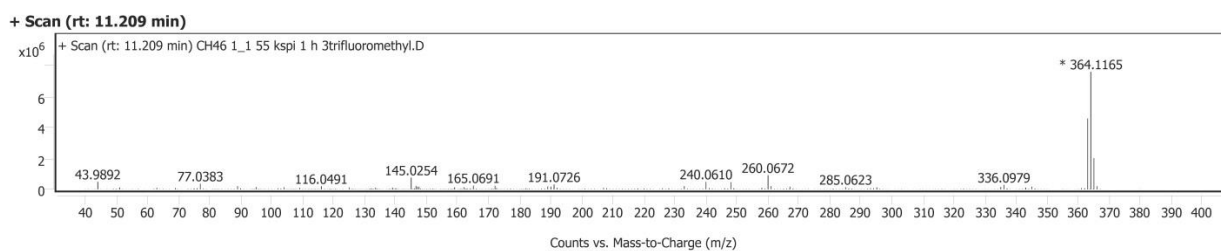

**Figure S9.** HRMS spectrum of 3,5-diphenyl-1-(3-(trifluoromethyl)phenyl)-1*H*-pyrazole (**6a**).<sup>3</sup>

(EI): m/z: calcd. for C<sub>22</sub>H<sub>15</sub>F<sub>3</sub>N<sub>2</sub> : 364.1187, found: 364.1165



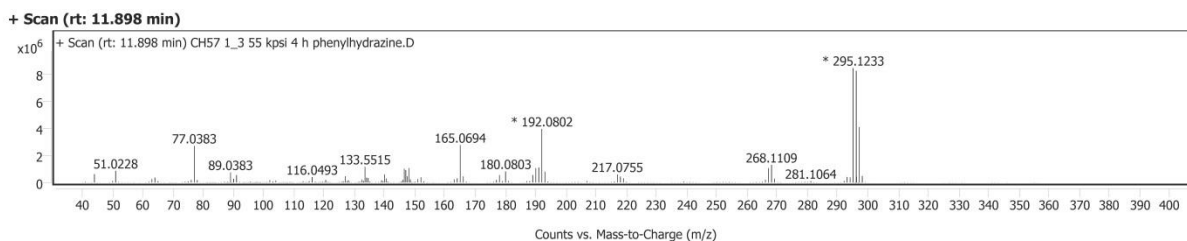

**Figure S10.** HRMS spectrum of 1,3,5-triphenyl-1*H*-pyrazole (**6b**).<sup>3</sup>

(EI): m/z: calcd. for C<sub>21</sub>H<sub>15</sub>N<sub>2</sub> : 295.1230, found: 295.1233

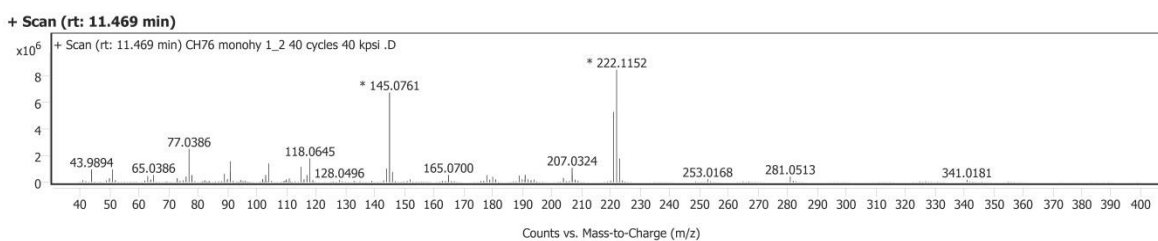

**Figure S11.** HRMS spectrum of 3,5-diphenyl-4,5-dihydro-1*H*-pyrazole (**6c**).<sup>4</sup>

(EI): m/z: calcd. for C<sub>15</sub>H<sub>14</sub>N<sub>2</sub> : 222.1157, Found: 222.1152

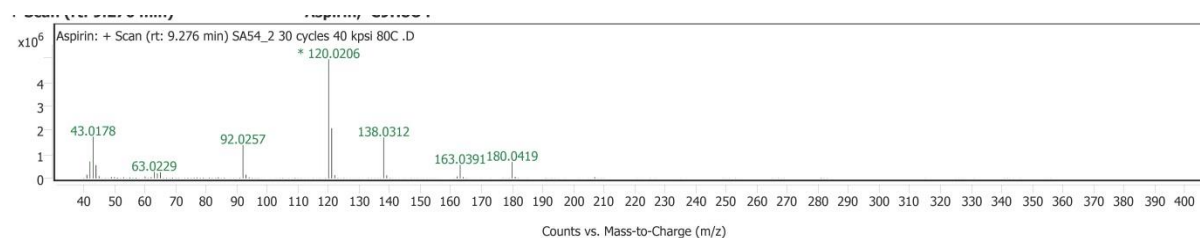

**Figure S12.** HRMS spectrum of acetylsalicylic acid (**9**).<sup>5</sup>

(EI): m/z: calcd. for C<sub>9</sub>H<sub>8</sub>O<sub>4</sub> : 180.0423, found: 180.0419

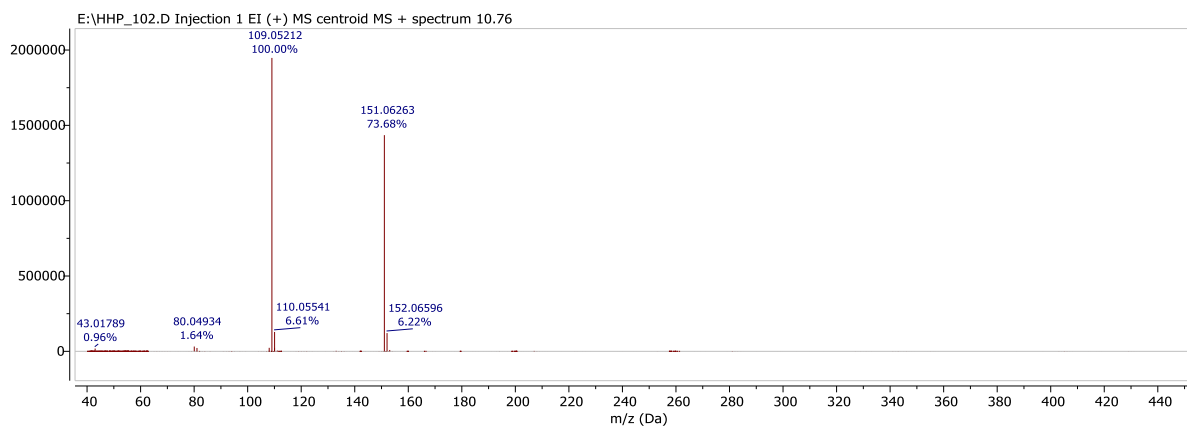

**Figure S13.** HRMS spectrum of acetaminophen (**11**).<sup>6</sup>

(EI): m/z: calcd. for  $C_8H_9NO_2$  : 151.0633, found: 151.0626

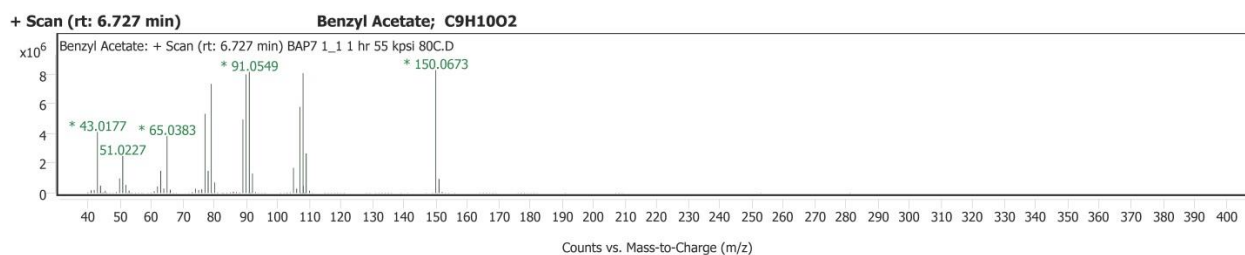

**Figure S14.** HRMS spectrum of benzyl acetate (**14a**).<sup>7</sup>

(EI): m/z: calcd. for  $C_9H_{10}O_2$  : 150.0681, found: 150.0673

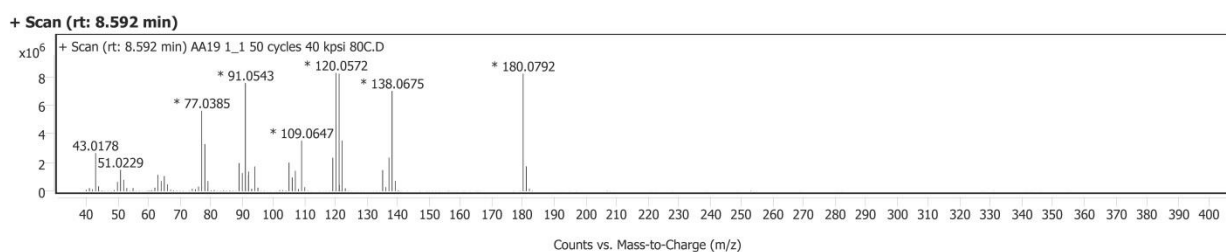

**Figure S15.** HRMS spectrum of 4-methoxybenzyl acetate (anisyl acetate, **14b**).<sup>8</sup>

(EI): m/z: calcd. for  $C_{10}H_{12}O_3$  : 180.0786, found: 180.0792

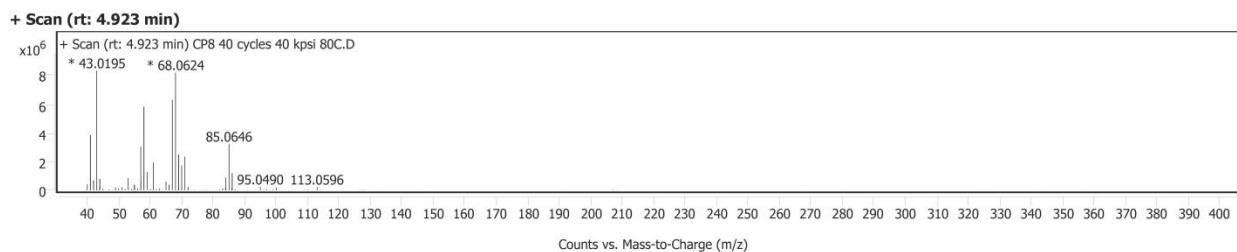

**Figure S16.** HRMS spectrum of cyclopentyl acetate (**14c**).<sup>9</sup>

(EI): m/z: calcd. for  $C_6H_9O_2$  : 113.0597, Found: 113.0596

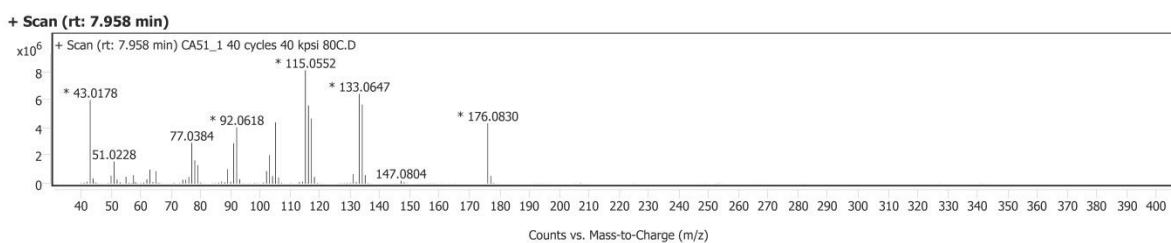

**Figure S17.** HRMS spectrum of cinnamyl acetate (**14d**).<sup>10</sup>

(EI): m/z: calcd. for  $C_{11}H_{12}O_2$  : 176.0837, found: 176.0830

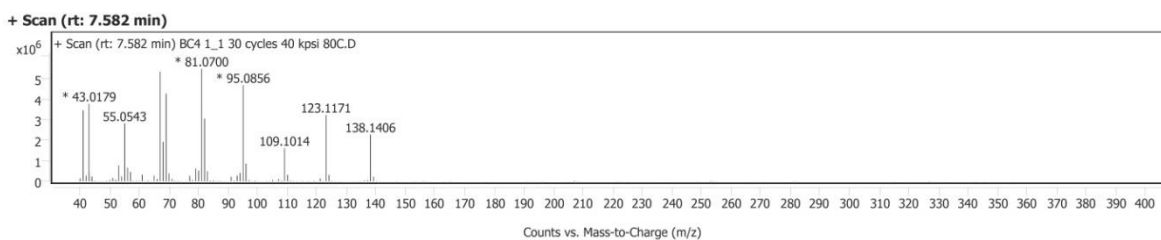

**Figure S18.** HRMS spectrum of  $\beta$ -citronellyl acetate (**14e**).<sup>11</sup>

(EI): m/z: calcd. for  $C_{10}H_{18}^+$ , Calc.: 138.1409, Found: 138.1406

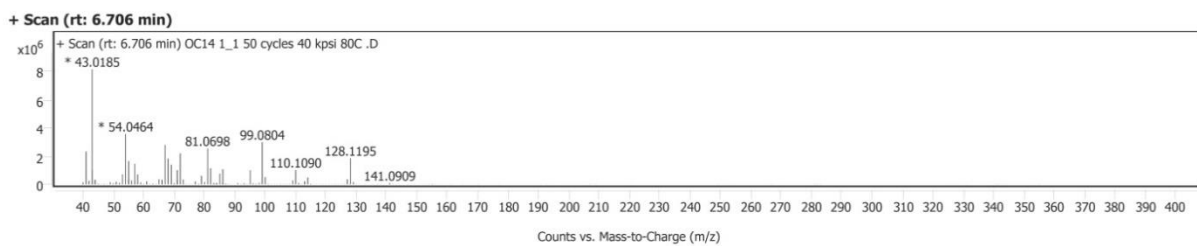

**Figure S19.** HRMS spectrum of oct-1-en-3-ol acetate (**14f**).<sup>12</sup>

(EI): m/z: calcd. for  $C_5H_7O_2$  : 99.0446, found: 99.0804

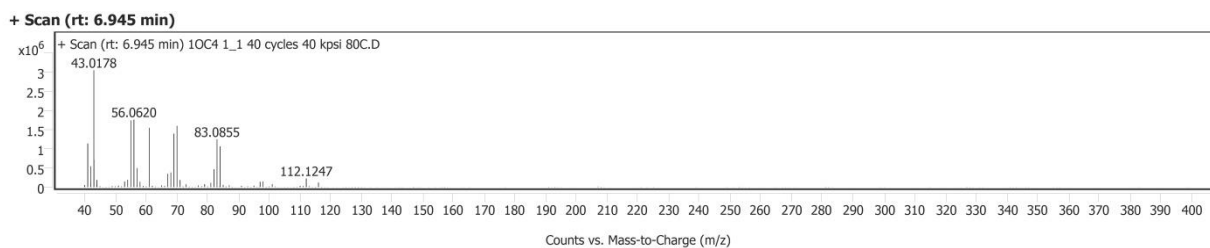

**Figure S20.** HRMS spectrum of octyl acetate (**14g**).<sup>12</sup>

(EI): m/z: calcd. for  $C_8H_{16}$  : 112.1252, Found: 112.1247

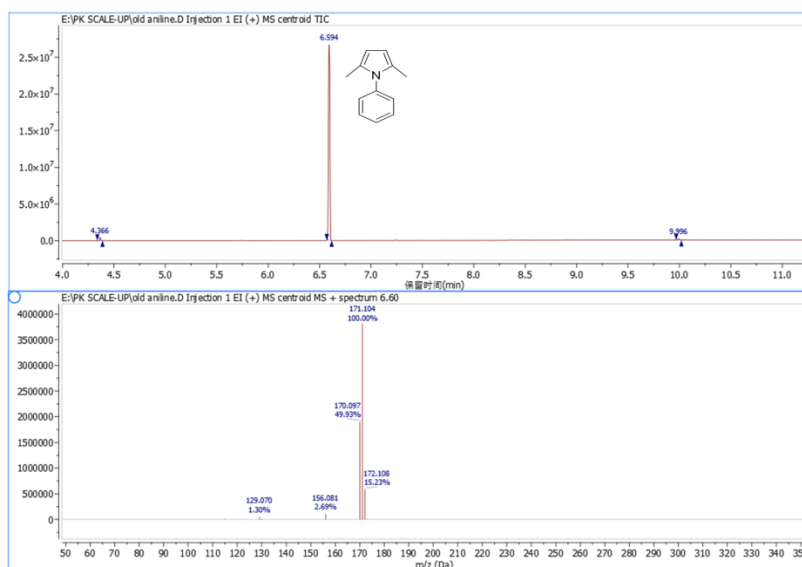

**Figure S21.** HRMS spectrum of 1-phenyl-2,4-dimethylpyrrole (**17a**).<sup>13</sup>

(EI): m/z: calcd. for  $C_{12}H_{13}N$  : 171.104, found: 171.104

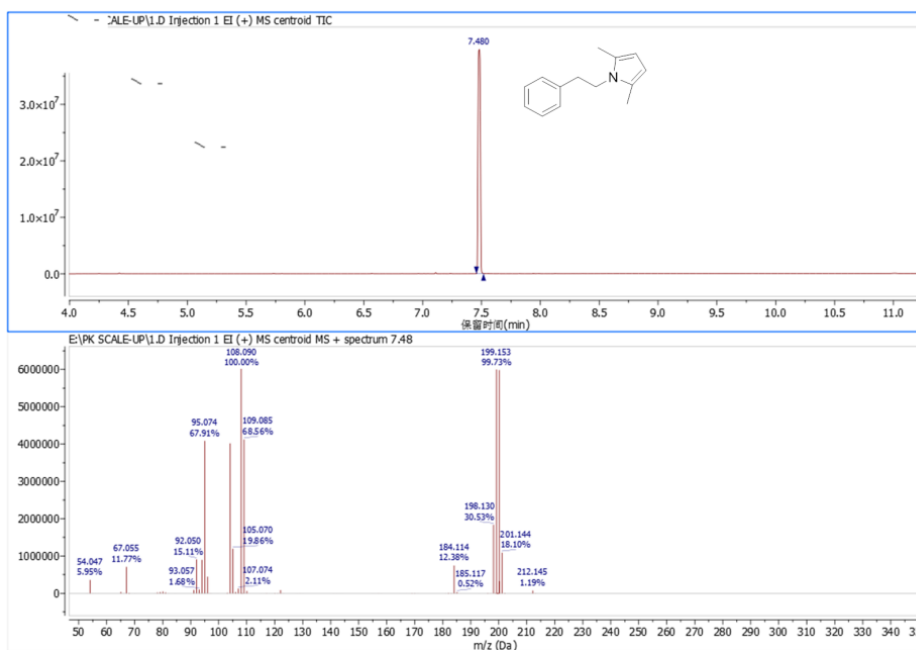

**Figure S22.** HRMS spectrum of 2,5-dimethyl-1-phenethyl-1H-pyrrole (**17b**)<sup>15</sup>

(EI): m/z: calcd. for C<sub>14</sub>H<sub>17</sub>N : 199.136, found: 199.153

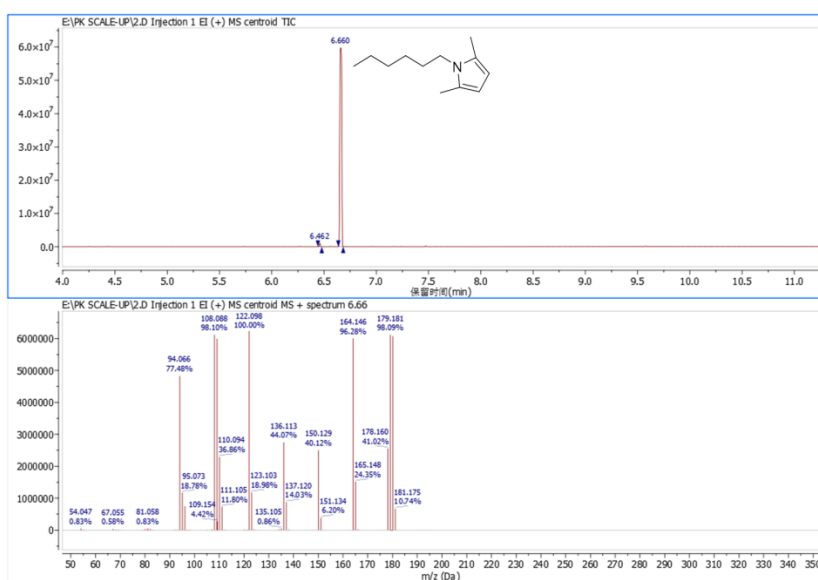

**Figure S23.** HRMS spectrum of 1-hexyl-2,4-dimethylpyrrole (**17c**)<sup>15</sup>

(EI): m/z: calcd. for C<sub>12</sub>H<sub>21</sub>N : 179.167, found: 179.181

#### 4. References

- 
- <sup>1</sup> M. Godino-Ojer, L. Milla-Diez, I. Matos, C. J. Duran-Valle, M. Bernardo, I. M. Fonseca, E. Perez Mayoral, *ChemCatChem* **2018**, *10*, 5215-5223.
- <sup>2</sup> S. Nemeth, L. Simandi, *J. Mol. Catal.* **1982**, *14*, 87-93.
- <sup>3</sup> S. M. Landge, A. Schmidt, V. Outerbridge, B. Török, *Synlett* **2007**, 1600-1604.
- <sup>4</sup> Ju, Yuhong; Varma, Rajender S. *J. Org. Chem.* **2006**, *71*, 135–141.
- <sup>5</sup> Allen F., Pon A., Greiner R., Wishart D. *Anal Chem.* **2016**, *88*, 7689-7697.
- <sup>6</sup> W.A. Garland, K.C. Hsiao, E.J. Pantuck, A.H. Conney, *J. Pharm. Sci.* **1977**, *66*, 340-344.
- <sup>7</sup> D. Cameron R. G. Cooks, *J. Am. Chem. Soc.* **1979**, *101*, 3162-3168.
- <sup>8</sup> Kishor P. Dhake, Pawan J. Tambade, Ziyauddin S. Qureshi, Rekha S. Singhal, and Bhalchandra M. Bhanage, *ACS Catalysis* **2011**, *1*, 316-322.
- <sup>9</sup> Rao, C.B., Rao, D.C., Babu, D.C. and Venkateswarlu, Y. *Eur. J. Org. Chem.* **2010**, 2855-2859.
- <sup>10</sup> Débieux, J.-L., Cosandey, A., Helgen, C. and Bochet, C.G. *Eur. J. Org. Chem.*, **2007**, 2073-2077.
- <sup>11</sup> S.-M. Seo, J. Kim, S.-G. Lee, C.-H. Shin, S.-C. Shin, I.-K. Park, *J. Agric. Food Chem.* **2009**, *57*, 15, 6596–6602.
- <sup>12</sup> M. Barbero, S. Cadamuro, S. Dughera, P. Venturello, *Synthesis* **2008**, 3625-3632.
- <sup>13</sup> G. Xie, A. Lazarev, B. Török, *Green Chem.* **2023**, *25*, 1582–1587
